# Supplementary material
Source: PubMed Central journal article supplement (PMC6418428)

Fig 1A

02-18-15

MKB

Rsa I

sans glucose

+ glucose

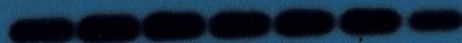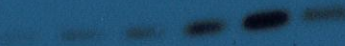

CHOC glucose à 3H après  
prélèvement.

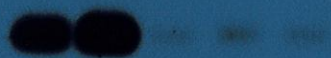

SS  
exp choc  
glucose  
Membrane du  
S2

Fig 1A

SS

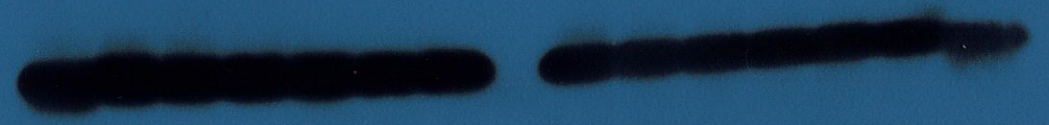

SS

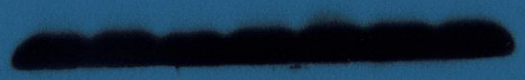

••FUJISAFETY)••  
••FUJISAFETY)••  
••FUJISAFETY)••  
••FUJISAFETY)••

Fig 1B

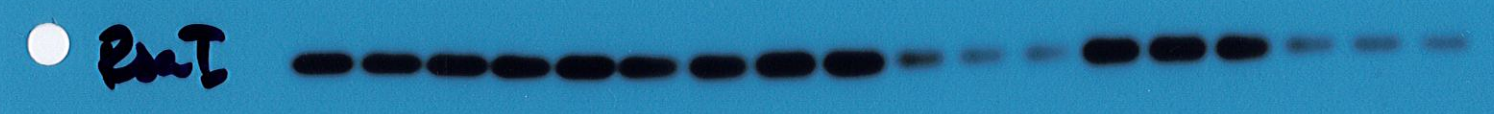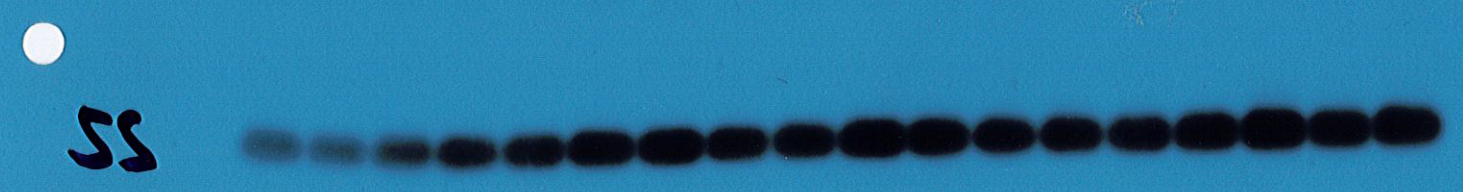

Fig 1c

BHT

WT

$\Delta$ CCpA

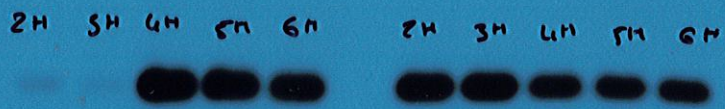

@  
NdaI

01.03.16.

rehybridation de la membrane  
@ CCPA . hybridation sur ds  
du SS.

Fig 1c

SS.

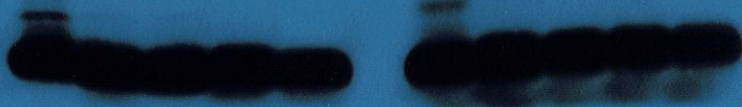

Fig 1D

Reg I

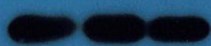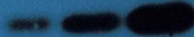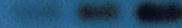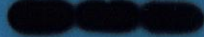

Figure 10

5S

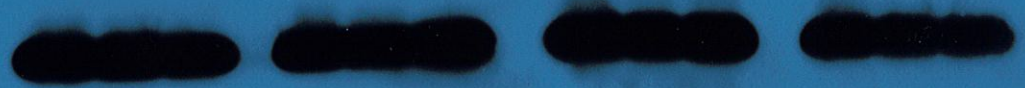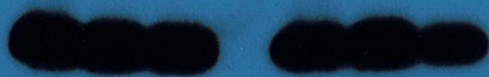

Supplement: EMBJ-38-e99363-s011.pdf [file EMBJ-38-e99363-s011.pdf]
