# Supplementary material
Source: PubMed Central journal article supplement (PMC6418428)
Supplement: EMBJ-38-e99363-s012.pdf [file EMBJ-38-e99363-s012.pdf]

Demh

21-02-17

... (Y133A2) • CPH • ILU • ...

... (Y133A2) • CPH • ILU • ...

... (Y133A2) • CPH • ILU • ...

0 12.5 nM 25 nM 50 nM 100 nM. // // // // //

RsaI\* / RsaG

RsaI\* wt

Mutant # 2.

Noa 6

Noa 6  
+  $\gamma$ ub<sub>4</sub>NoaI

30.01.17  
dev mt over weekend  
(Cahier 6 p 15)

gluc 2 +  $\gamma$ ub<sub>4</sub>  
NoaI.

30.01.17  
gluc 2  
dev mt  
over  
weekend

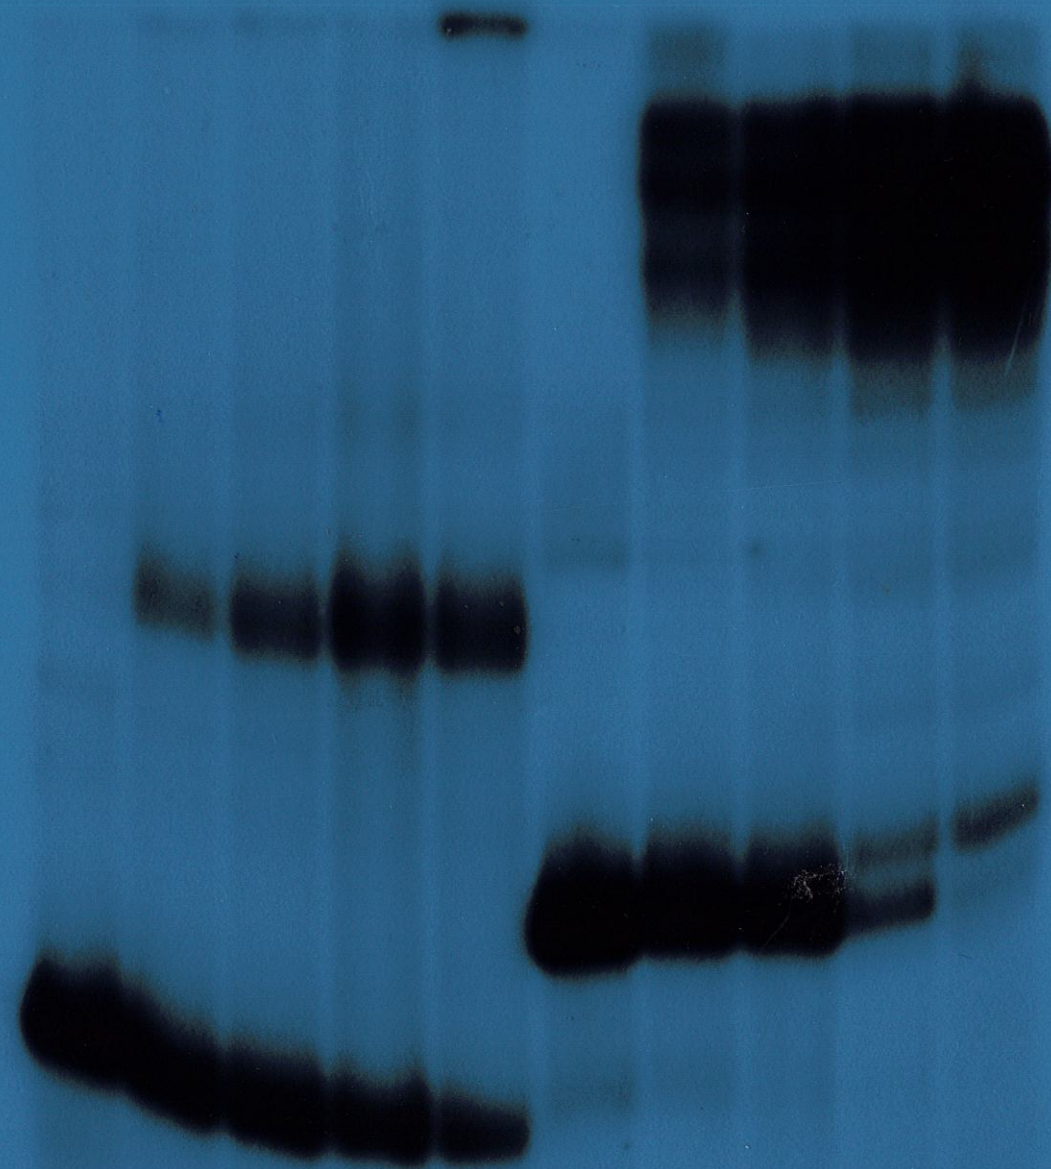

Bandshift 2.

Fait le 24-02-17

par être sure  
du shift Mut 1 - Roa G

Roa I / Roa G

Roa I ⊕

Roa I ⊕  
Mut 2

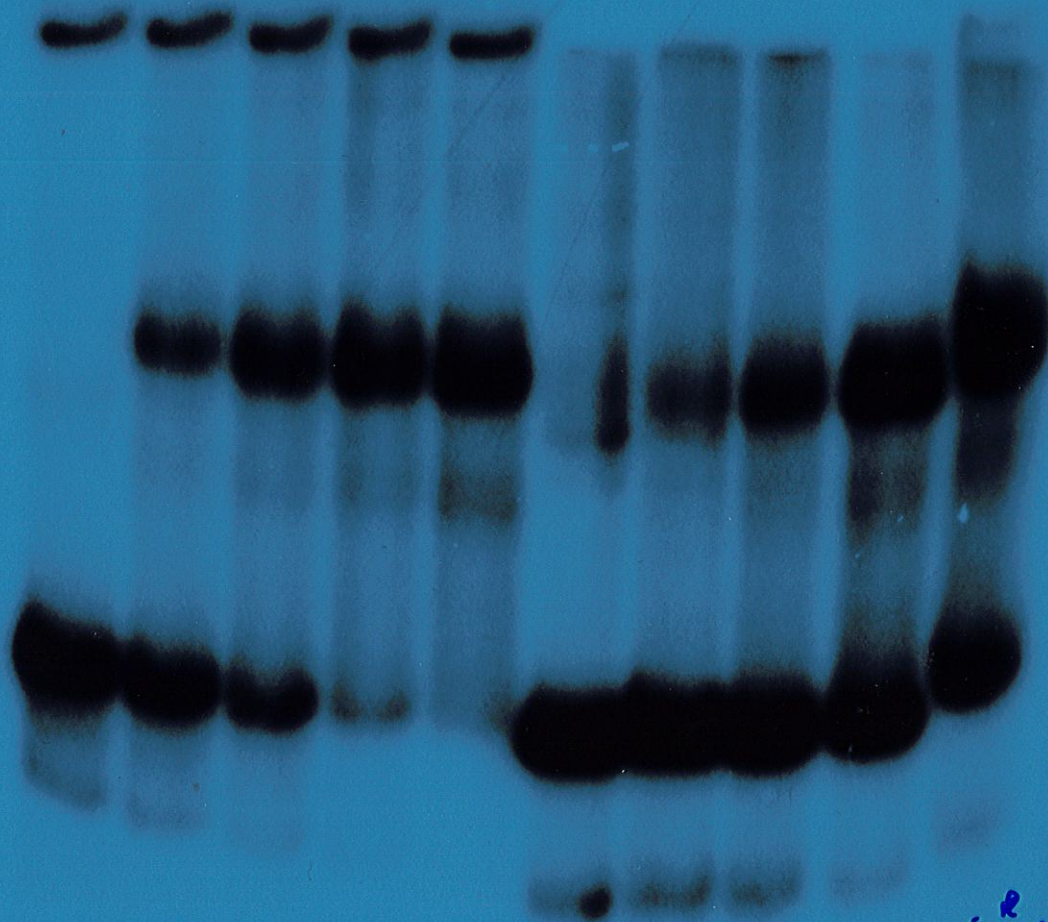

Bang shift du  
01-02-17 -

glcU\_2

RsaI WT

Met L

gel 2

gluc 2.

Isa A.

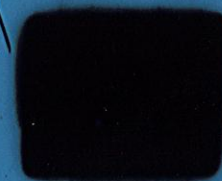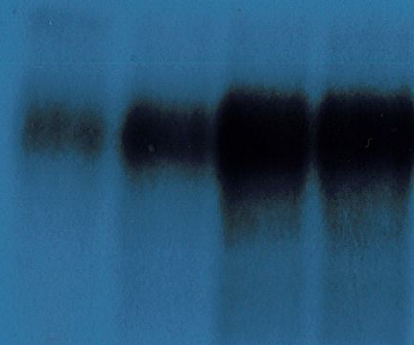

Mut 3\*

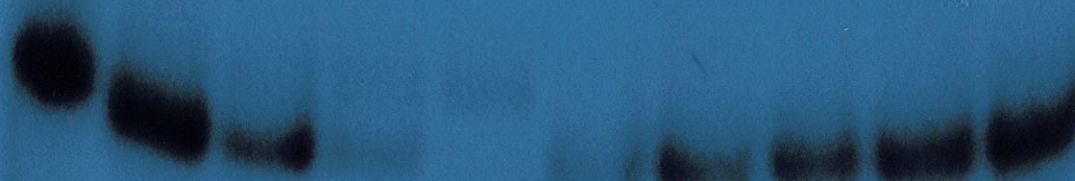

ut

deuts  
30.01.17.

aut + Ica2.

Het 6 + Ica2.

...HRC(SAFETY)...

...FUJI-HRC(SAFETY)...

June 20.01.17

Ica R.

...FUJI-HRC-(SAFETY)...

Mar 3.

...FUJI-HRC-(SAFETY)...

...FUJI-HRC-(SAFETY)...

31.01.18 .

fn3K  
rck

wt

Met 4

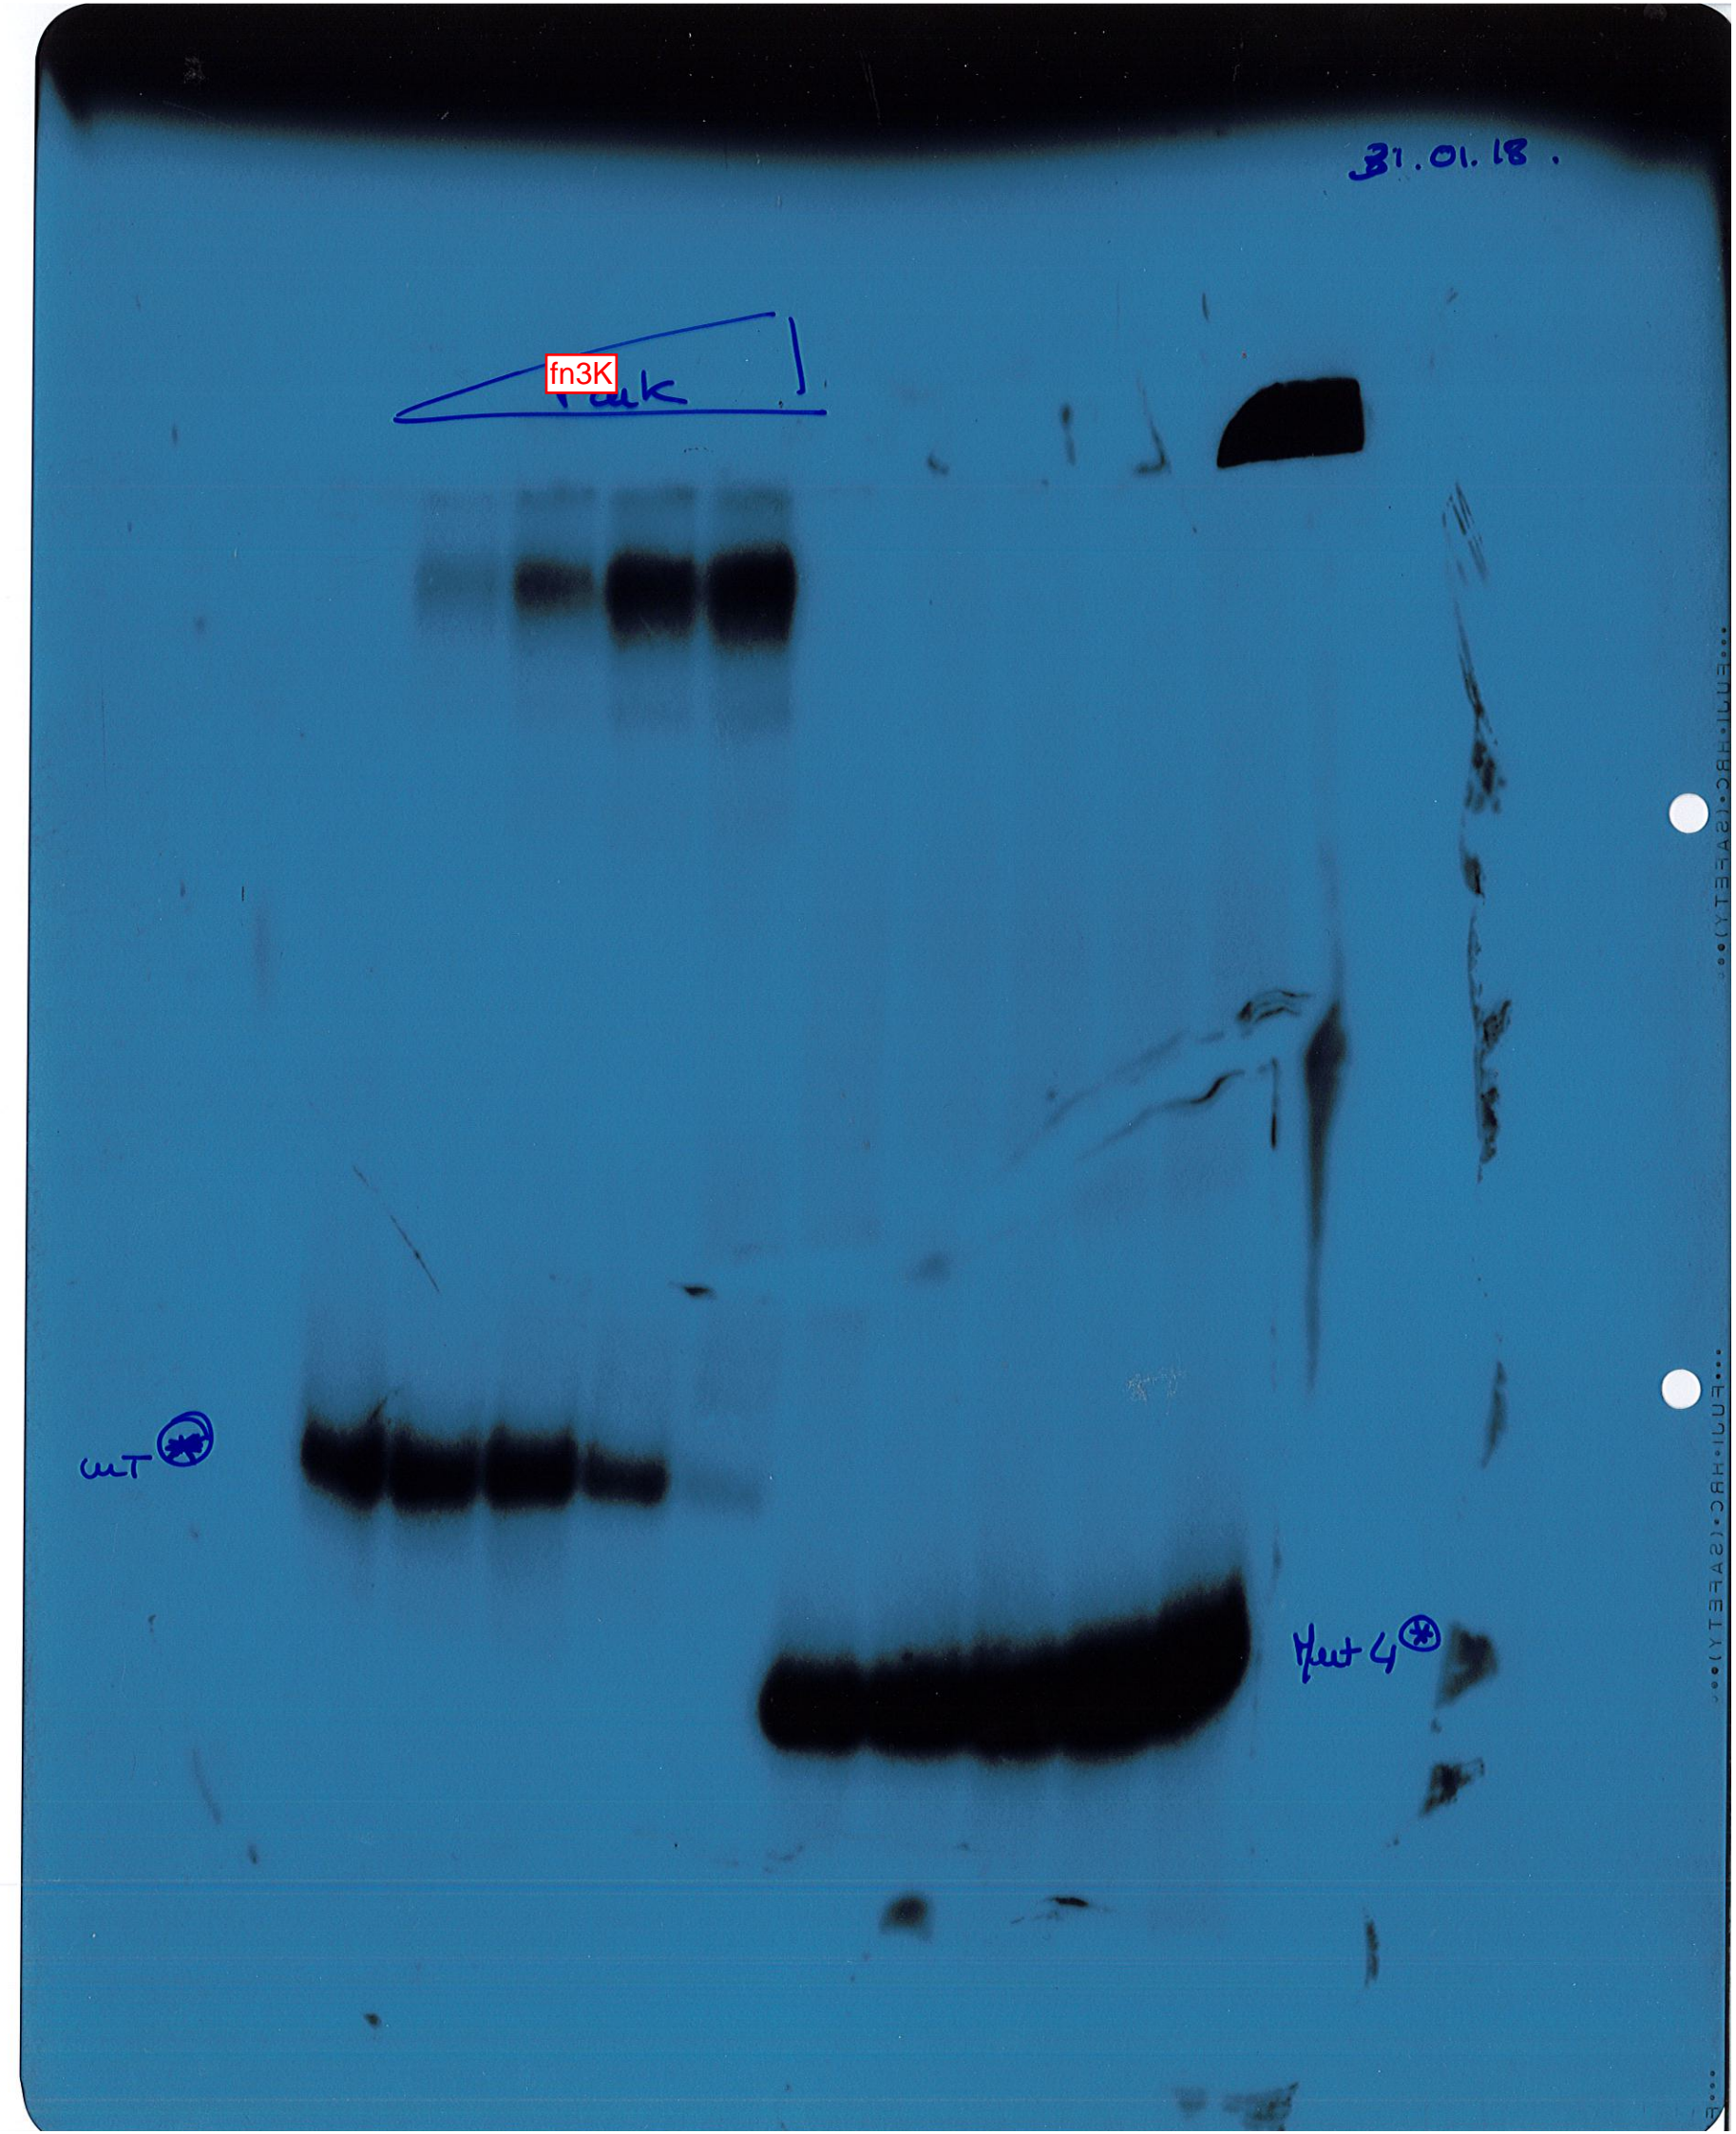

21.01.18.  
Frank,

fn3K

Mur3<sup>®</sup>
