# Supplementary material
Source: PubMed Central journal article supplement (PMC6418428)
Supplement: EMBJ-38-e99363-s013.pdf [file EMBJ-38-e99363-s013.pdf]

Pas parfait mais le résultat est là  
avec premier "vrai" résultat glen.2  
Vrai inhibe bien la traduction de  
glen.2.

Glen-2  
test # 4.  
22-07-16.

TAC q  
~~TAC q~~

12415

12415

$I_1 + 16$

Toe-Print fn3K

TC GA

~~TC GA~~

11

L AG

11
