# Supplementary material
Source: PubMed Central journal article supplement (PMC6418428)

Fig 4B

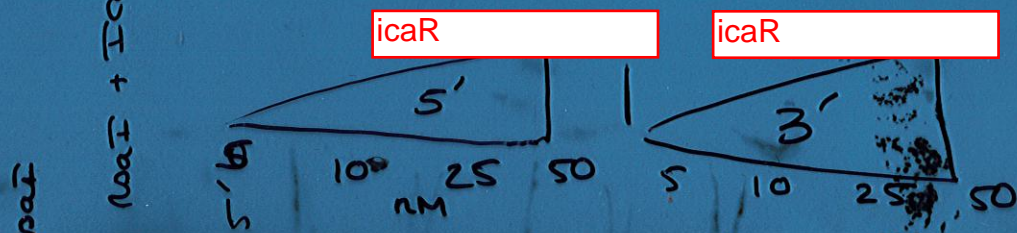

Fig 4B

05-05-16  
Bandshift #3  
NaaE\* / Icar cut Vs Subst

icar cut

icar

SUBST

NaaE\*

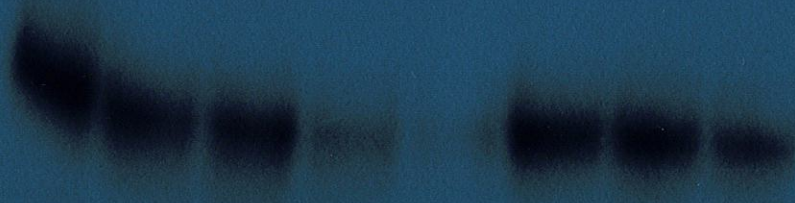

Fig 4C

Agarose gel rRNAs

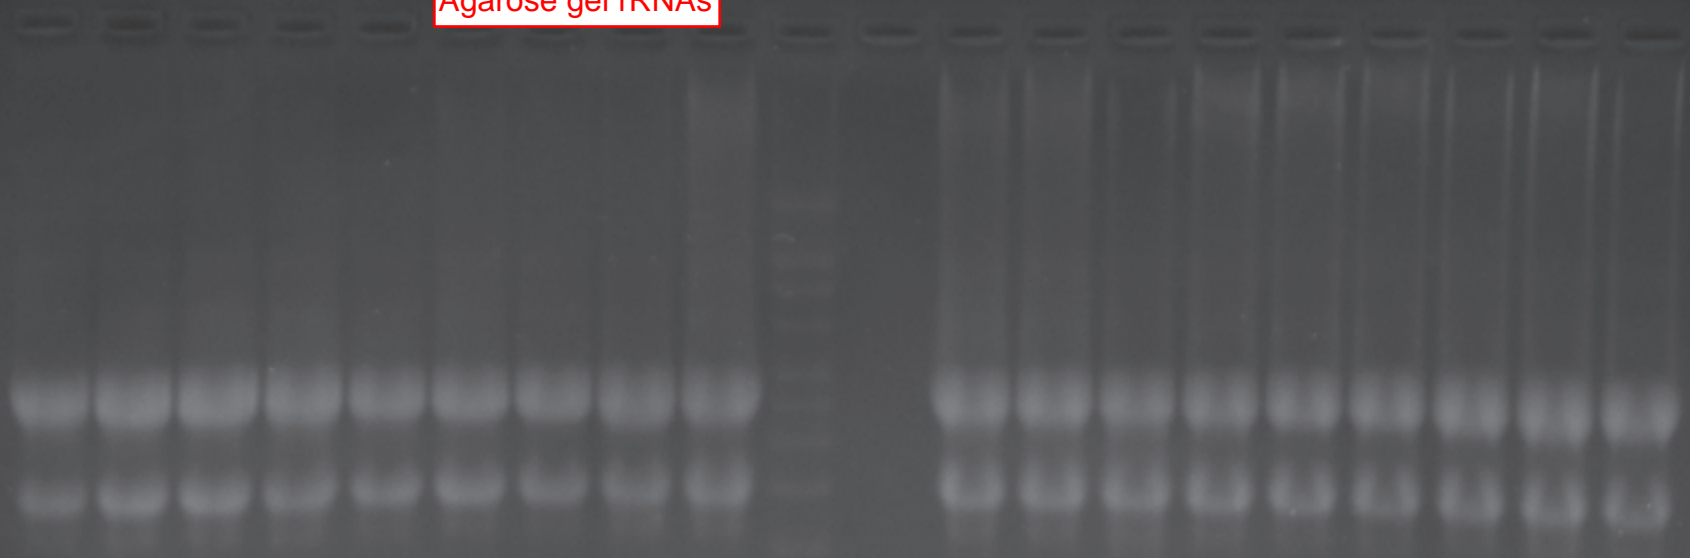

Fig 4C

Exp 11

Northern blot  
RsaI

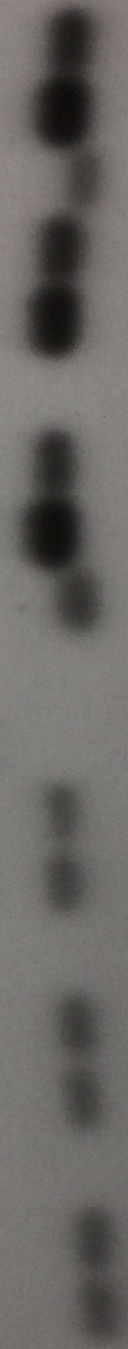

Fig 4C

Dot-blot PIA-PNAG

03.0117  
S.a 132  
TSB Nall  
6h

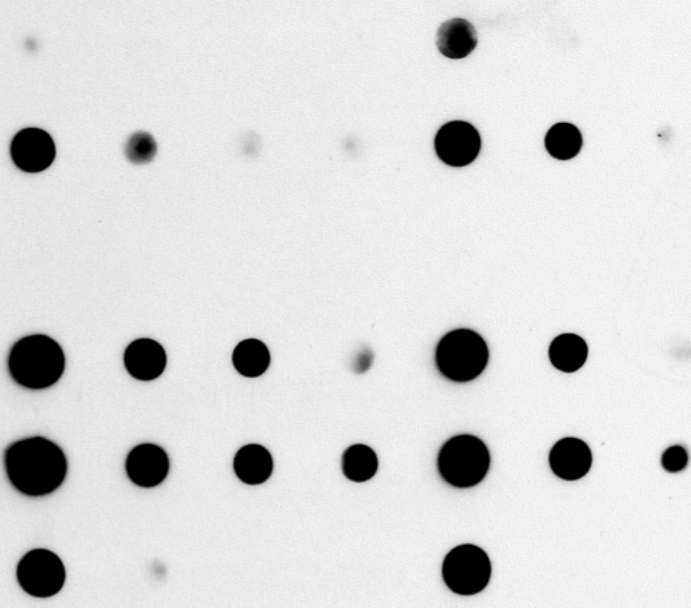

Supplement: EMBJ-38-e99363-s014.pdf [file EMBJ-38-e99363-s014.pdf]
