# Supplementary material
Source: PubMed Central journal article supplement (PMC6418428)

Figure 5A

Slu

Slu + RAG

95

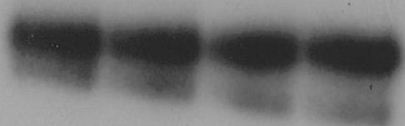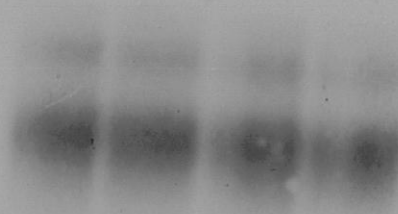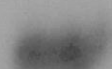

Fig 5A

figure 5A

λ242

λ242 + OAC

\*  
OAC

7.

Fig 5A

SA

- RsaC

+ RsaC

HP0912

HP0912

0 50 75 100 150 50 75 100 150 50 min

RsaI\*

RsaC

RsaI\*

Fig 5B

RaI

8lu

1242

RaG\*

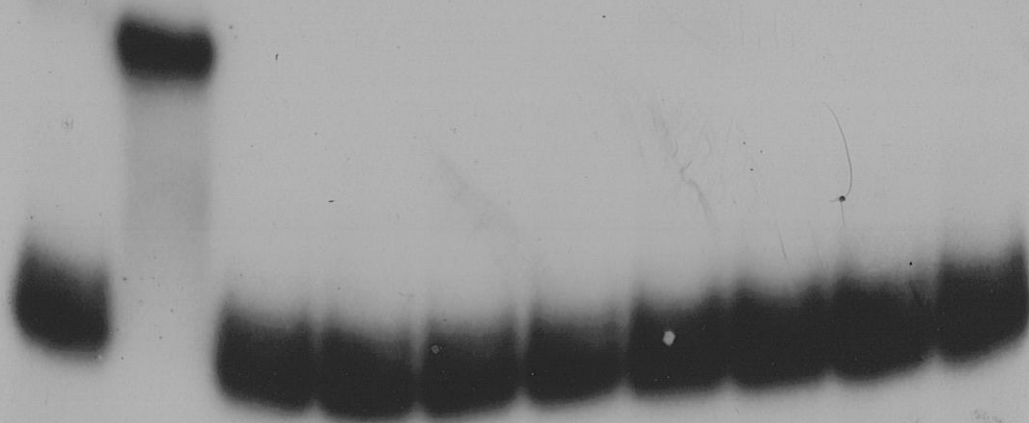

97

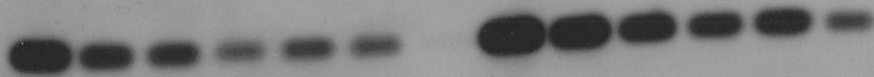

Fig 5C

-HGOO1 WT

+HGOO1 Δrsd1

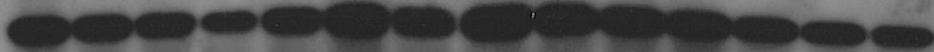

to 2' 4' 8' 15' 30' 60' to 2' 4' 8' 15' 30' 60'

Fig 5C

SS  
↑

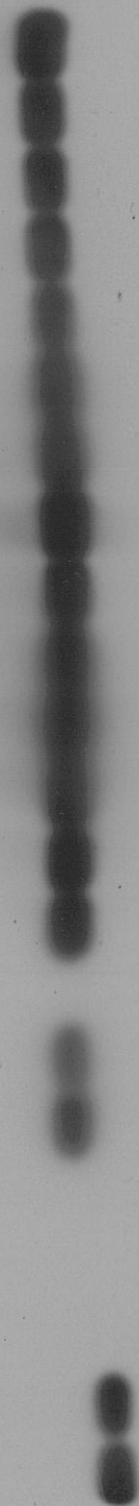

HG001 wt      HG001 ΔvscA

Figure 5c

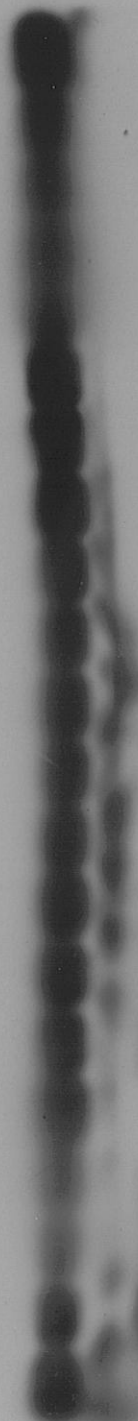

(87)

Figure 5C

WT

$\Delta$ MSA 6

18-1

to 2' 4' 8' 15' 30' 60' 1h 2' 4' 8' 15' 30' 60'

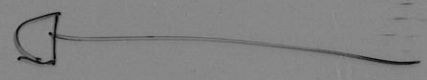

Fig 5C

HG002 WT

HG002  $\Delta$ MSA 6

SS

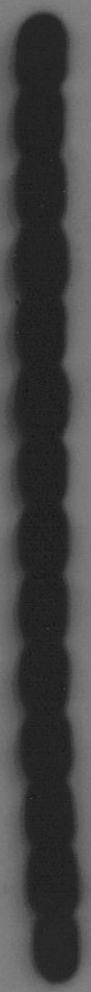

Supplement: EMBJ-38-e99363-s015.pdf [file EMBJ-38-e99363-s015.pdf]
